# Supplementary material
Source: PubMed Central journal article supplement (PMC3888436)
Supplement: NIHMS393889-supplement-01.pdf [file NIHMS393889-supplement-01.pdf]

# Mailed Intervention to Promote Sun Protection of Children

## A Randomized Controlled Trial

Lori A. Crane, PhD, Nancy A. Asdigian, PhD, Anna E. Barón, PhD, Jenny Aalborg, MPH,  
Alfred C. Marcus, PhD, Stefan T. Mokrohisky, MD, Tim E. Byers, MD, Robert P. Dellavalle, MD,  
Joseph G. Morelli, MD

### Appendix A

Characteristics by participation status, white non-Hispanic Colorado children aged 6–9 years, 2004–2007 (N=686), %

| Characteristic                              | 2004 interview |                | 2005 interview |                | 2006 interview |                | 2007 interview |                |
|---------------------------------------------|----------------|----------------|----------------|----------------|----------------|----------------|----------------|----------------|
|                                             | No<br>(n=23)   | Yes<br>(n=663) | No<br>(n=43)   | Yes<br>(n=643) | No<br>(n=44)   | Yes<br>(n=642) | No<br>(n=72)   | Yes<br>(n=614) |
| <b>Gender</b>                               |                |                |                |                |                |                |                |                |
| Male                                        | 26.1           | <b>48.3*</b>   | 44.2           | 47.7           | 47.7           | 47.5           | 44.4           | 47.9           |
| Female                                      | 73.9           | 51.7           | 55.8           | 52.3           | 52.3           | 52.5           | 55.6           | 52.1           |
| <b>Parent education</b>                     |                |                |                |                |                |                |                |                |
| < college                                   | 34.8           | 24.6           | 37.2           | 24.1           | 29.5           | 24.6           | 30.6           | 24.3           |
| ≥ college                                   | 65.2           | 75.4           | 62.8           | 75.9           | 70.5           | 75.4           | 69.4           | 75.7           |
| <b>Household income, \$</b>                 |                |                |                |                |                |                |                |                |
| <75,000                                     | 54.5           | 36.4           | 40.5           | 36.8           | 38.1           | 37.0           | 38.6           | 36.9           |
| 75,000–99,999                               | 18.2           | 27.6           | 26.2           | 27.3           | 21.4           | 27.7           | 22.9           | 27.8           |
| ≥100,000                                    | 27.3           | 36.0           | 33.3           | 35.9           | 40.5           | 35.4           | 38.6           | 35.4           |
| <b>Hair color</b>                           |                |                |                |                |                |                |                |                |
| Blonde–light brown                          | 69.6           | 68.5           | 62.8           | 68.9           | 75.0           | 68.1           | 70.8           | <b>68.2*</b>   |
| Red                                         | 4.3            | 3.8            | 4.7            | 3.7            | 0.0            | 4.0            | 2.8            | 3.9            |
| Medium–dark brown                           | 26.1           | 27.3           | 30.2           | 27.1           | 22.7           | 27.6           | 23.6           | 27.7           |
| Black                                       | 0.0            | 0.5            | 2.3            | 0.3            | 2.3            | 0.3            | 2.8            | 0.2            |
| <b>Eye color</b>                            |                |                |                |                |                |                |                |                |
| Black–brown                                 | 36.4           | 27.5           | 26.2           | 27.9           | 20.9           | 28.2           | 19.7           | 28.7           |
| Blue                                        | 45.5           | 48.8           | 45.2           | 48.9           | 51.2           | 48.5           | 50.7           | 48.5           |
| Green/hazel                                 | 18.2           | 23.7           | 28.6           | 23.2           | 27.9           | 23.2           | 29.6           | 22.8           |
| <b>Skin color</b>                           |                |                |                |                |                |                |                |                |
| Dark white                                  | 0.0            | 11.3           | 12.2           | 10.9           | 7.0            | 11.3           | 12.7           | 10.8           |
| Medium white                                | 50.0           | 36.8           | 26.8           | 37.9           | 37.2           | 37.2           | 39.4           | 36.9           |
| Fair white                                  | 50.0           | 51.9           | 61.0           | 51.2           | 55.8           | 51.6           | 47.9           | 52.3           |
| <b>Skin sensitivity</b>                     |                |                |                |                |                |                |                |                |
| Painful burn followed by no tan (Type 1)    | 4.3            | <b>12.4*</b>   | 18.6           | 11.7           | 13.6           | 12.0           | 13.9           | 11.9           |
| Painful burn followed by light tan (Type 2) | 8.7            | 34.1           | 32.6           | 33.3           | 20.5           | 34.1           | 29.2           | 33.7           |
| Slight burn followed by little tan (Type 3) | 65.2           | 42.8           | 41.9           | 43.7           | 52.3           | 43.0           | 41.7           | 43.8           |
| No burn followed by good tan (Type 4)       | 21.7           | 10.7           | 7.0            | 11.4           | 13.6           | 10.9           | 15.3           | 10.6           |
| <b>Study assignment</b>                     |                |                |                |                |                |                |                |                |
| Control group                               | 52.2           | 49.3           | 51.2           | 49.3           | 63.6           | <b>48.4*</b>   | 55.6           | 48.7           |
| Intervention group                          | 47.8           | 50.7           | 48.8           | 50.7           | 36.4           | 51.6           | 44.4           | 51.3           |
| <b>Baseline sunscreen use</b>               |                |                |                |                |                |                |                |                |
| Never–half the time                         | –              | –              | 27.3           | 18.4           | 21.9           | 18.7           | 23.3           | 18.4           |
| Most of the time–all of the time            | –              | –              | 72.7           | 81.6           | 78.1           | 81.3           | 76.7           | 81.6           |

Appendix A (continued)

| Characteristic                              | 2004 skin exam |                | 2005 skin exam |                | 2006 skin exam |                | 2007 skin exam |                |
|---------------------------------------------|----------------|----------------|----------------|----------------|----------------|----------------|----------------|----------------|
|                                             | No<br>(n=138)  | Yes<br>(n=548) | No<br>(n=130)  | Yes<br>(n=556) | No<br>(n=126)  | Yes<br>(n=560) | No<br>(n=157)  | Yes<br>(n=529) |
| <b>Gender</b>                               |                |                |                |                |                |                |                |                |
| Male                                        | 48.6           | 47.3           | 50.8           | 46.8           | 54.8           | 45.9           | 51.0           | 46.5           |
| Female                                      | 51.4           | 52.7           | 49.2           | 53.2           | 45.2           | 54.1           | 49.0           | 53.5           |
| <b>Parent education</b>                     |                |                |                |                |                |                |                |                |
| < college                                   | 30.4           | 23.5           | 33.1           | <b>23.0*</b>   | 28.6           | 24.1           | 33.8           | <b>22.3*</b>   |
| ≥ college                                   | 69.6           | 76.5           | 66.9           | 77.0           | 71.4           | 75.9           | 66.2           | 77.7           |
| <b>Household income, \$</b>                 |                |                |                |                |                |                |                |                |
| <75,000                                     | 33.8           | 37.9           | 39.8           | 36.4           | 32.5           | 38.1           | 36.2           | 37.3           |
| 75,000-99,999                               | 28.6           | 26.9           | 20.3           | 28.9           | 24.4           | 27.9           | 23.7           | 28.3           |
| ≥100,000                                    | 37.6           | 35.2           | 39.8           | 34.7           | 43.1           | 34.0           | 40.1           | 34.4           |
| <b>Hair color</b>                           |                |                |                |                |                |                |                |                |
| Blonde-light brown                          | 65.9           | 69.2           | 67.7           | 68.7           | 68.3           | 68.6           | 73.2           | 67.1           |
| Red                                         | 3.6            | 3.8            | 3.8            | 3.8            | 4.0            | 3.8            | 3.2            | 4.0            |
| Medium-dark brown                           | 29.7           | 26.6           | 26.9           | 27.3           | 26.2           | 27.5           | 22.3           | 28.7           |
| Black                                       | 0.7            | 0.4            | 1.5            | 0.2            | 1.6            | 0.2            | 1.3            | 0.2            |
| <b>Eye color</b>                            |                |                |                |                |                |                |                |                |
| Black-brown                                 | 30.1           | 27.2           | 26.4           | 28.1           | 24.0           | 28.6           | 25.6           | 28.4           |
| Blue                                        | 46.3           | 49.3           | 51.2           | 48.1           | 49.6           | 48.5           | 51.3           | 47.9           |
| Green/hazel                                 | 23.5           | 23.5           | 22.5           | 23.8           | 26.4           | 22.9           | 23.1           | 23.7           |
| <b>Skin color</b>                           |                |                |                |                |                |                |                |                |
| Dark white                                  | 11.7           | 10.8           | 10.2           | 11.2           | 8.8            | 11.5           | 10.3           | 11.2           |
| Medium white                                | 37.2           | 37.2           | 36.7           | 37.3           | 38.4           | 36.9           | 37.2           | 37.2           |
| Fair white                                  | 51.1           | 52.0           | 53.1           | 51.5           | 52.8           | 51.6           | 52.6           | 51.6           |
| <b>Skin sensitivity</b>                     |                |                |                |                |                |                |                |                |
| Painful burn followed by no tan (Type 1)    | 12.3           | 12.1           | 11.6           | 12.2           | 12.1           | 12.1           | 11.5           | 12.3           |
| Painful burn followed by light tan (Type 2) | 26.1           | 35.1           | 31.0           | 33.8           | 29.0           | 34.2           | 30.1           | 34.2           |
| Slight burn followed by little tan (Type 3) | 47.1           | 42.7           | 45.7           | 43.1           | 41.9           | 43.9           | 44.9           | 43.2           |
| No burn followed by good tan (Type 4)       | 14.5           | 10.2           | 11.6           | 10.9           | 16.9           | 9.8            | 13.5           | 10.4           |
| <b>Study assignment</b>                     |                |                |                |                |                |                |                |                |
| Control group                               | 47.8           | 49.8           | 50.8           | 49.1           | 49.2           | 49.5           | 51.0           | 49.0           |
| Intervention group                          | 52.2           | 50.2           | 49.2           | 50.9           | 50.8           | 50.5           | 49.0           | 51.0           |
| <b>Baseline sunscreen use</b>               |                |                |                |                |                |                |                |                |
| Never-half the time                         | --             | --             | 22.5           | 18.1           | 20.0           | 18.6           | 21.9           | 18.0           |
| Most of the time-all of the time            | --             | --             | 77.5           | 81.9           | 80.0           | 81.4           | 78.1           | 82.0           |

Note: Bold indicates significance.

\*p<0.05 based on Chi-square test; \*\*p<0.001 based on Chi-square test
